# Supplementary material
Source: PubMed Central journal article supplement (PMC3075784)
Supplement: pp.110.165126_2.pdf [file pp.110.165126_2.pdf]

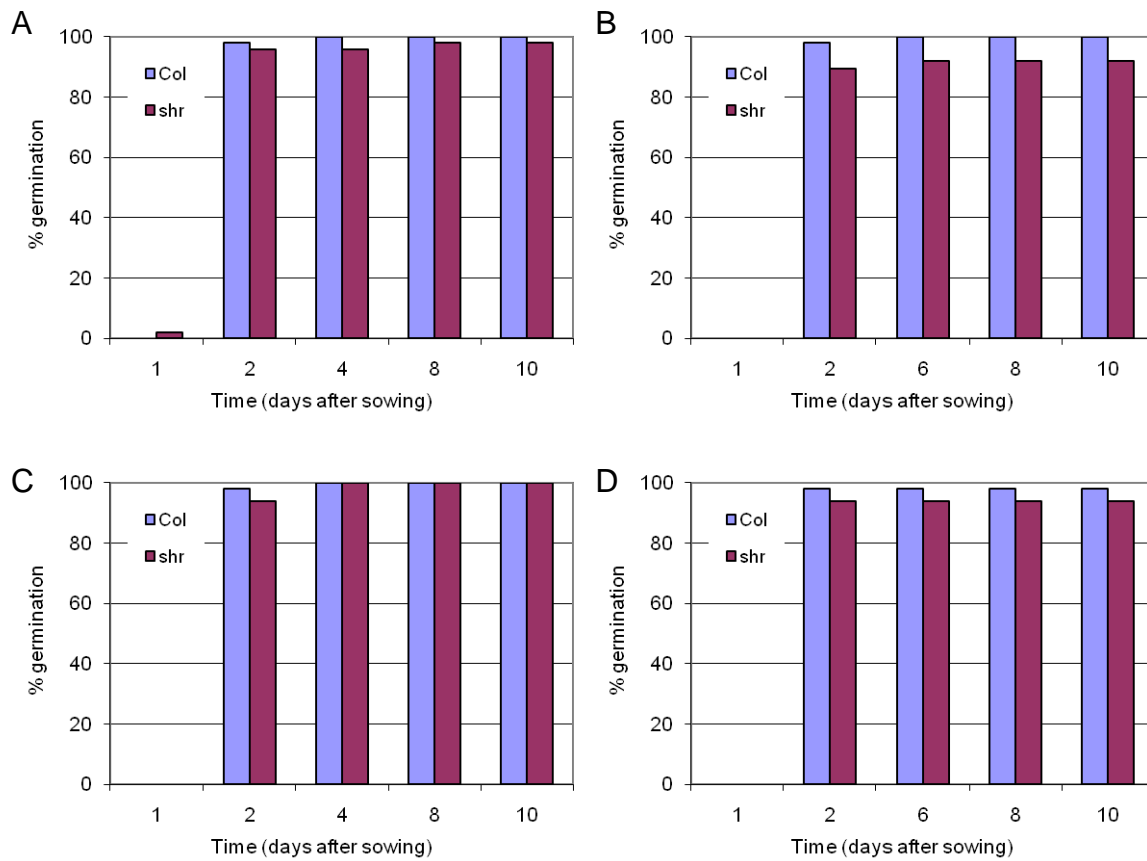

**Supplemental Figure S1.** Germination of the *shr* mutant is comparable to wildtype.

Seeds (n=50) were sowed on 1% agarose medium in water (A-B) or 1% agarose 1/2 MS medium (C-D), without chilling treatment (A-C) or after a chilling treatment (B-D). In all treatments except one, germination rate is slightly lower for *shr* than for the wild-type, but not significantly so.

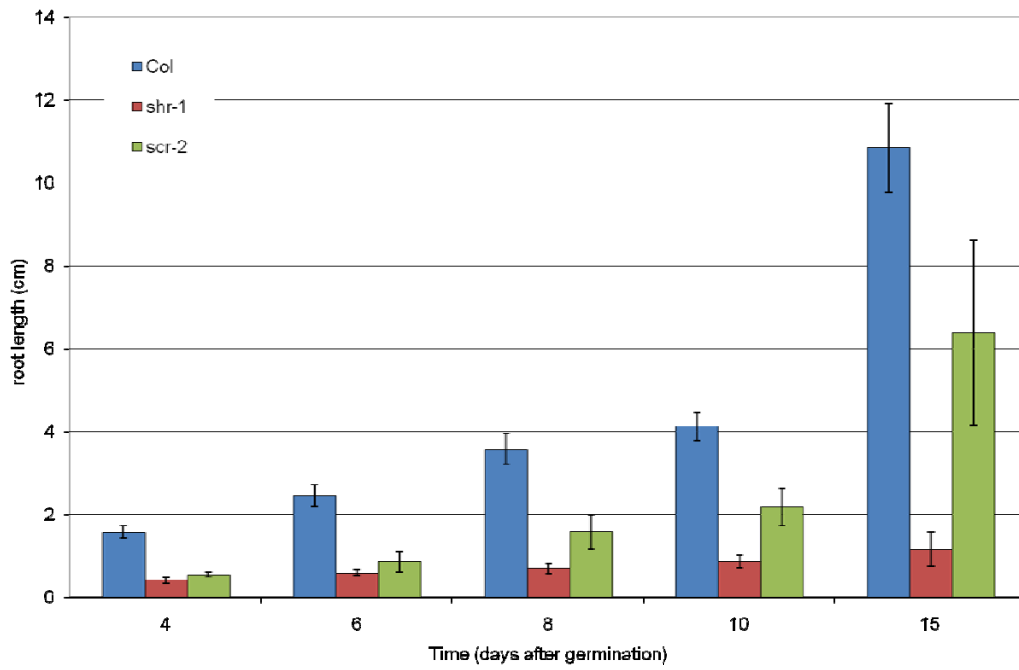

**Supplemental Figure S2.** Root length in *shr* is severely reduced compared to wildtype and *scr*.

While *scr* root growth is still half of wild-type root growth and occurs with a similar rate, *shr* root growth is stunted.

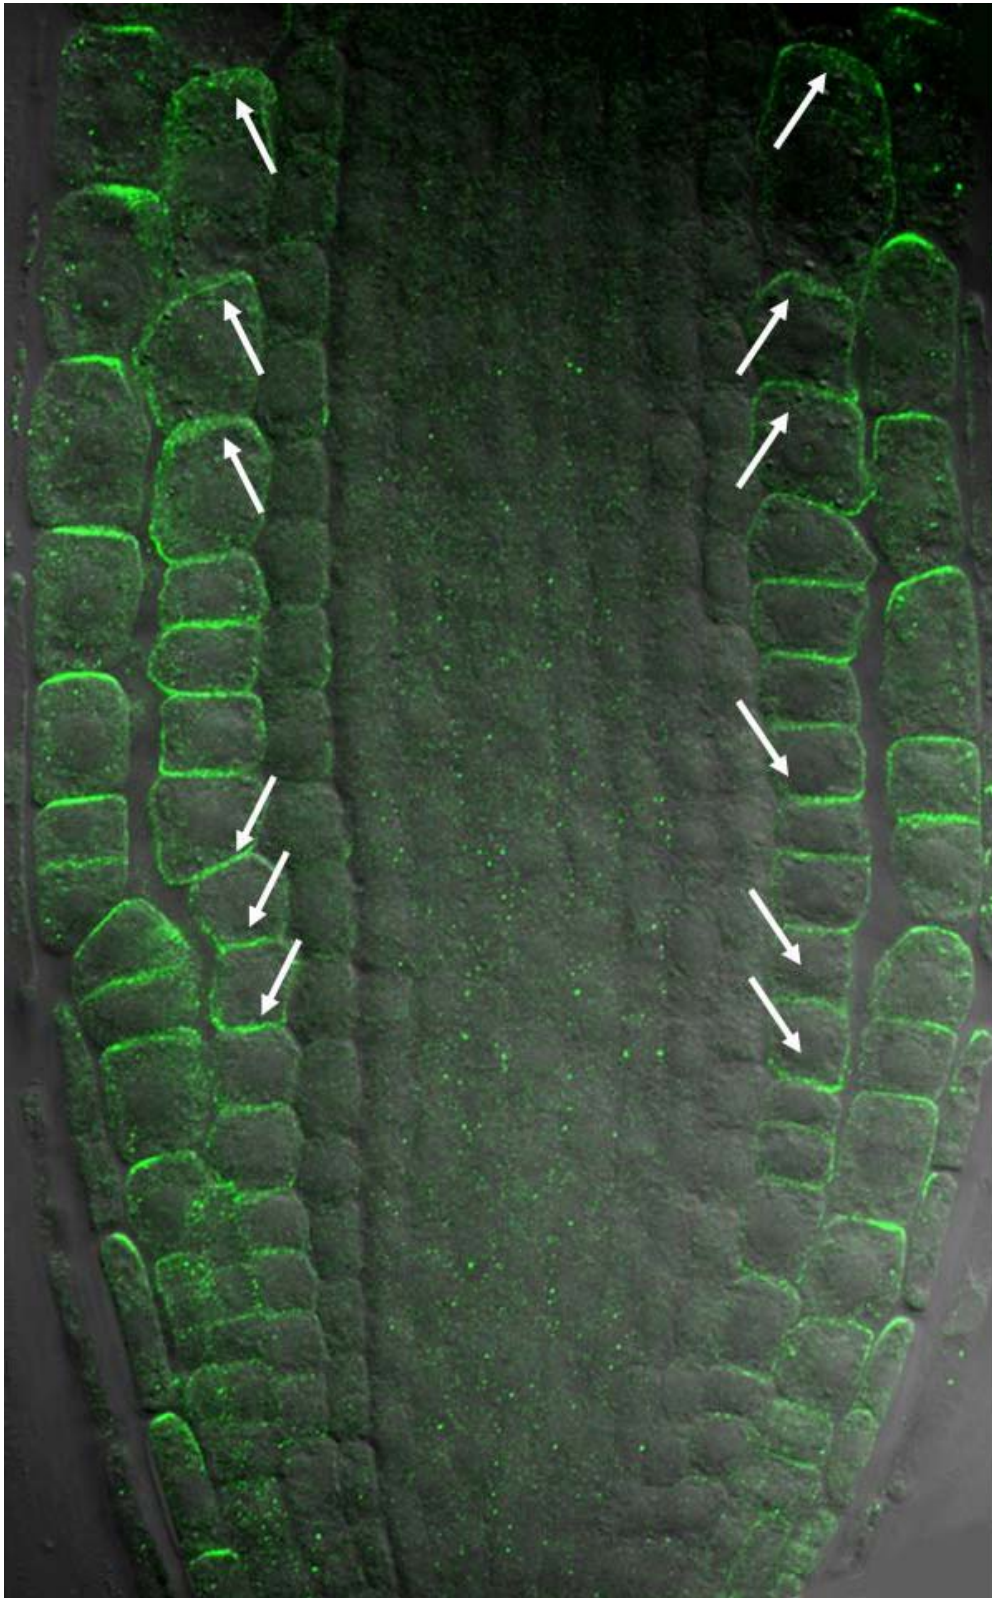

**Supplemental Figure S3.** Inversion of polarity of PIN2 in the cortical layer.

In wild-type root the shift from apical to basal cortical localisation for PIN2 occurs at the level of the transition from division to elongation zone.

PIN2 expression was assessed by immunolocalization.

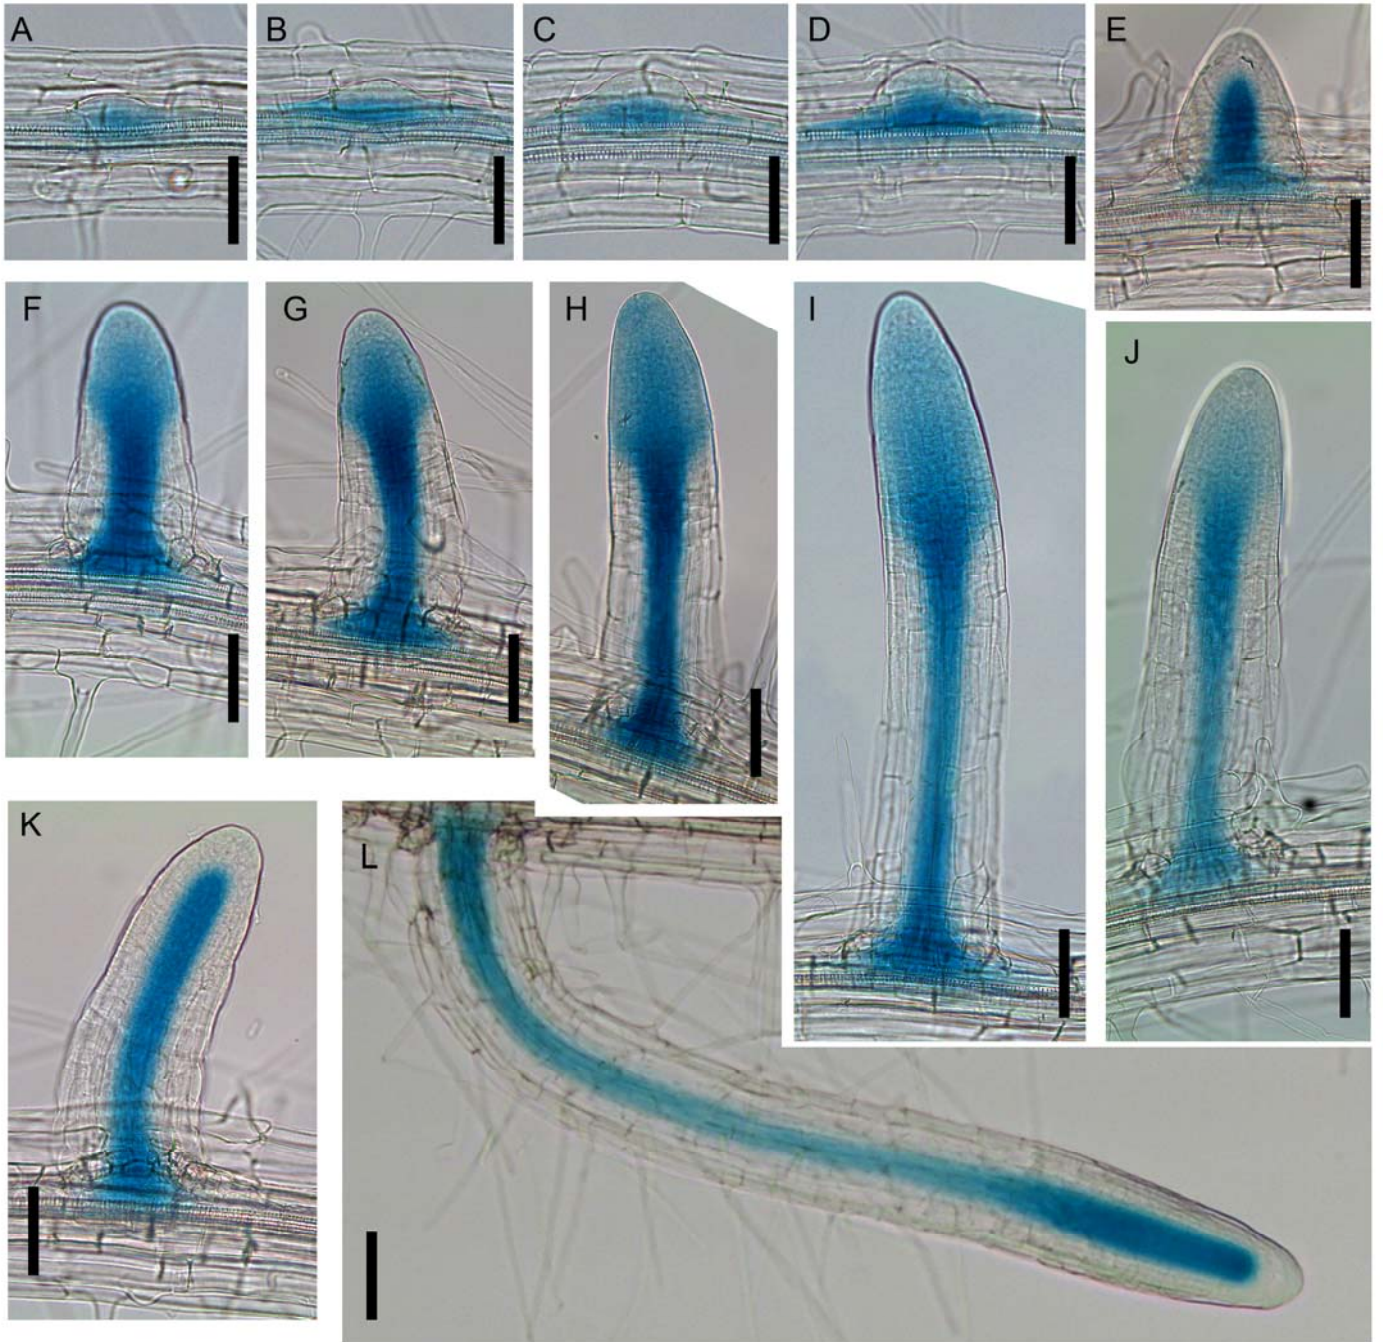

**Supplemental Figure S4.** *SHRpro:GUS* expression pattern during lateral root development.

DIC microscope images of lateral root primordia and lateral roots of 8-days-old *SHRpro:GUS* Arabidopsis.

**(A & B)** *SHR* is initially expressed in the lower half of the young primordium (stage II-IV).

**(C to E)** As the primordium acquires its dome-shape, *SHR* expression domain is progressively restricted to the central part of the primordium, corresponding to future stele tissues.

**(F to J)** Upon emergence, *SHR* expression becomes diffuse in the root cap while still being specifically expressed in the stele and anchorage domain of the young lateral root.

**(K & L)** *SHR* expression in the lateral root then resumes a stele specific pattern similar to the one observed in the primary root. This change in expression pattern is not associated with a specific lateral root length but rather a certain distance from the primary root tip (change observed at  $14 \pm 4$  mm from the root tip,  $n = 8$ ). Scale bar = 50 micrometers.

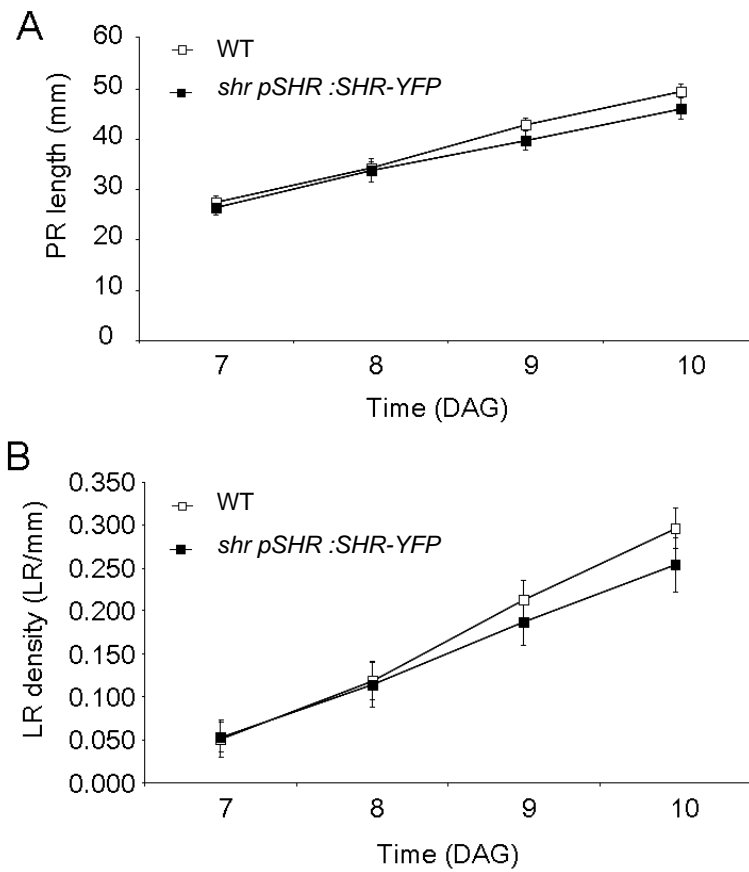

**Supplemental Figure S5.** The  $SHR_{pro}:SHR-YFP$  transgene rescues the *shr* mutation.

**(A)** Primary root (PR) length of wild-type (n=21) and *shr*  $SHR_{pro}:SHR-YFP$  (n=23) over time.

**(B)** Lateral root (LR) density in wild-type (n=21) and *shr*  $SHR_{pro}:SHR-YFP$  (n=23) over time.

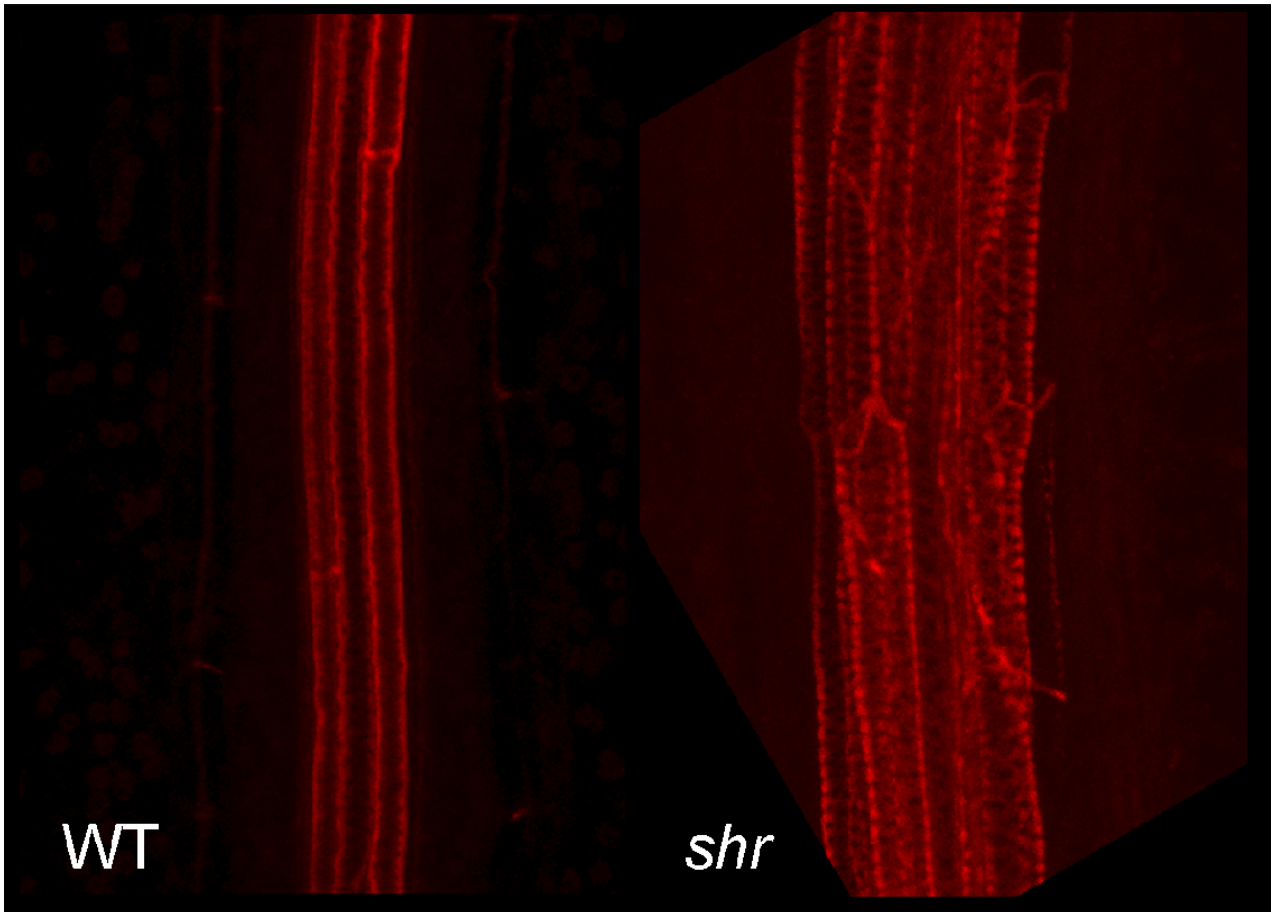

**Supplemental Figure S6.** The *shr* mutation causes ectopic lignification in the hypocotyl. Seedlings were stained for 5 min. in 0.01% basic fuchsin and then washed twice in 70% ethanol. Stained seedlings were then clarified (Acidified methanol protocol) and mounted in 10% glycerol. Confocal microscopy was used to visualize xylem lignification (red).

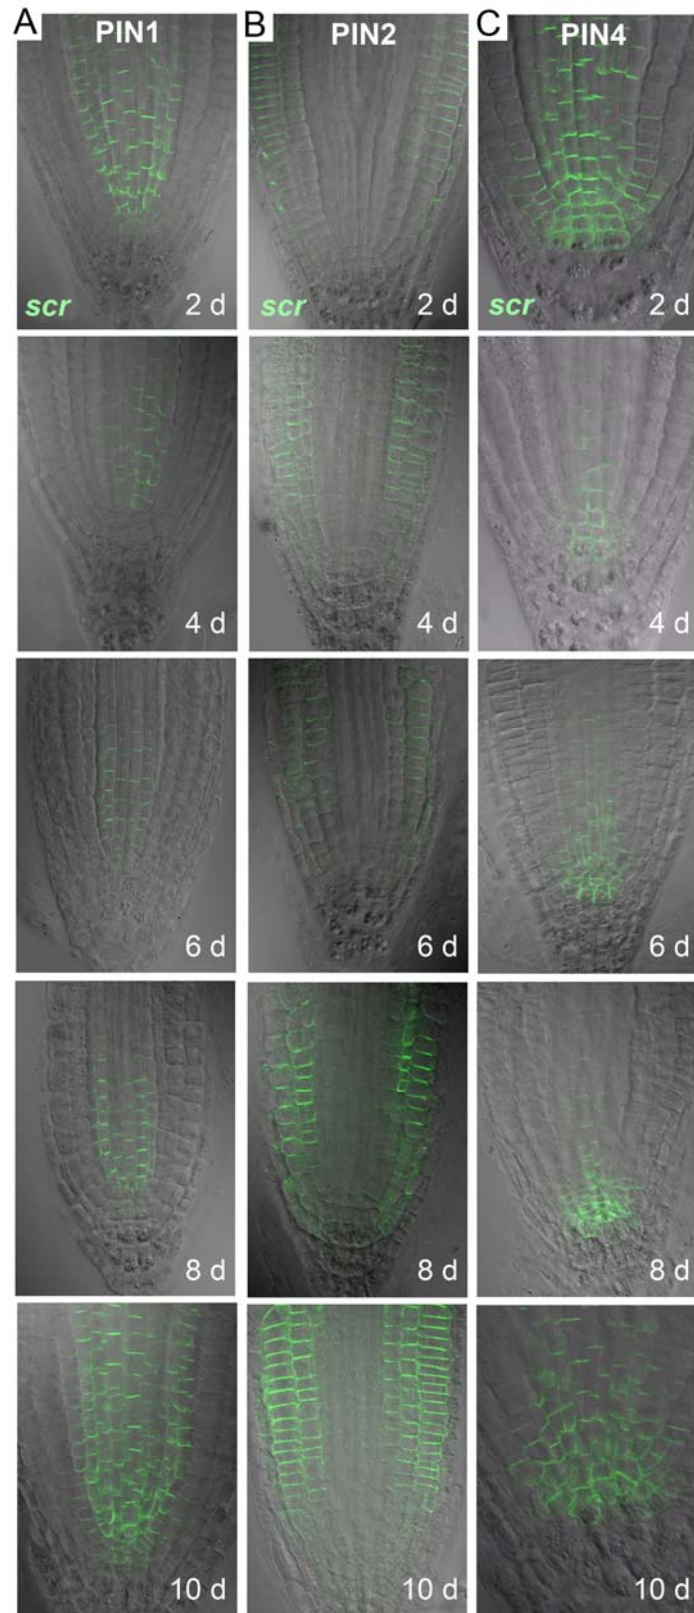

**Supplemental Figure S7.** The loss of auxin carrier expression in *shr* is independent of SCR. Dynamic changes of PIN1 (A), PIN2 (B) and PIN4 (C) abundance over time in *scr*. PIN expression was assessed employing immunolocalization (see materials and methods).

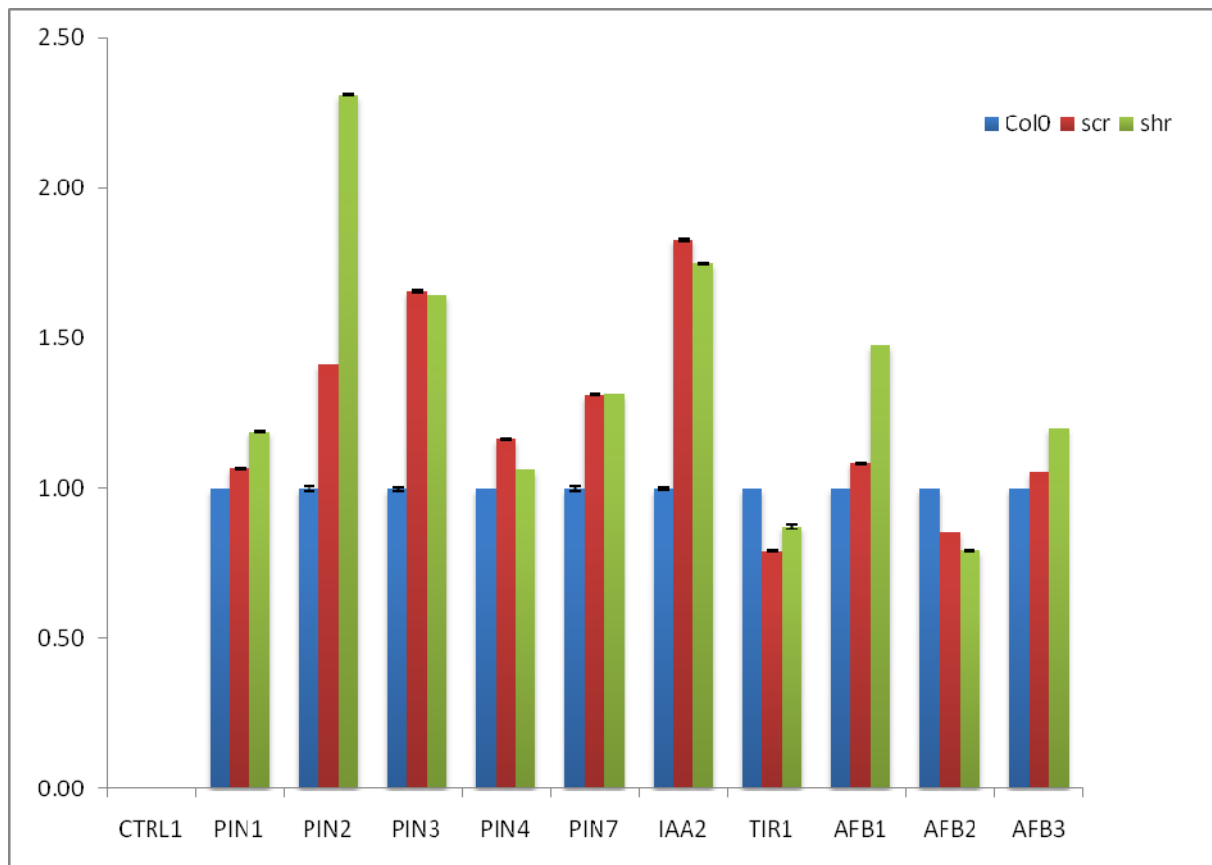

**Supplemental Figure S8.** Expression of auxin-related genes in wild-type, *shr* and *scr* 6 days old seedlings.

Reverse transcriptase quantitative PCR was performed on RNA isolated from 6 days old seedlings using primers designed against several *PIN*, *IAA2* and *TIR/AFB* gene sequences. Values represent normalized means +/- s.d.
